# Supplementary material
Source: Research Square preprint supplement (doi:10.21203/rs.3.rs-9558602/v1)
Supplement: Supplementary file 3 [file e75ff1b64888d41174eba848.pdf]

We have deposited all original NMR spectroscopic data (FIDs) for this manuscript to the open access repository Zenodo with DOI: 10.5281/zenodo.19502936.

Until the publication of the paper this material remains on restricted access and can be reached by the referees using the following link:

[https://zenodo.org/records/19502937?token=eyJhbGciOiJIUzUxMiJ9.eyJpZCI6ImZyVhMmE5LTQyZTI4NzE4ODBiLTU4NDc1MTVjYjI1MyIsImRhdGEiOiJ9LCJyZW5kb20iOiIxOTg2MjU2Y2UzYTdmNTQyYjExNDdjM2JjZmJmMDZlYyJ9.w\\_OvcDjb-2rZLukV-AiuwMSwSPMcE\\_FuBbKDLIIG4VbOiOHMMO8sPF9X-ygUW0rcGR9zZo3foXH9Wj7zuvjKDg](https://zenodo.org/records/19502937?token=eyJhbGciOiJIUzUxMiJ9.eyJpZCI6ImZyVhMmE5LTQyZTI4NzE4ODBiLTU4NDc1MTVjYjI1MyIsImRhdGEiOiJ9LCJyZW5kb20iOiIxOTg2MjU2Y2UzYTdmNTQyYjExNDdjM2JjZmJmMDZlYyJ9.w_OvcDjb-2rZLukV-AiuwMSwSPMcE_FuBbKDLIIG4VbOiOHMMO8sPF9X-ygUW0rcGR9zZo3foXH9Wj7zuvjKDg)

Upon publication, this material will be made open access.
